# Supplementary material for: The Effect of Aromatic Plant Extracts Encapsulated in Alginate on the Bioactivity, Textural Characteristics and Shelf Life of Yogurt
Source: MDPI journal article supplement (doi:10.3390/antiox12040893), 2023-04-06
Supplement: s1 [file s1]

# Supplementary Materials

**Table S1.** Sensory properties (score) evolution of concentrated yogurt with microencapsulated plant extracts during storage.

| Sensory Properties         | Storage Period, day | Samples                  |                          |                       |                       |                          |                          |                       |                       |                          |
|----------------------------|---------------------|--------------------------|--------------------------|-----------------------|-----------------------|--------------------------|--------------------------|-----------------------|-----------------------|--------------------------|
|                            |                     | CY                       | 0.15%CYMS<br>E           | 0.30%CYMS<br>E        | 0.45%CYMS<br>E        | 0.60%CYMS<br>E           | 0.15%CYM<br>RE           | 0.30%CYM<br>RE        | 0.45%CYM<br>RE        | 0.60%CYM<br>RE           |
| Appearance and consistency | 1                   | 5.00±0.0 <sup>c</sup>    | 5.00±0.0 <sup>c</sup>    | 5.00±0.0 <sup>c</sup> | 5.00±0.0 <sup>c</sup> | 5.00±0.0 <sup>c</sup>    | 5.00±0.0 <sup>c</sup>    | 5.00±0.0 <sup>c</sup> | 5.00±0.0 <sup>c</sup> | 5.00±0.0 <sup>c</sup>    |
|                            | 8                   | 5.00±0.0 <sup>c</sup>    | 5.00±0.0 <sup>c</sup>    | 5.00±0.0 <sup>c</sup> | 5.00±0.0 <sup>c</sup> | 5.00±0.0 <sup>c</sup>    | 5.00±0.0 <sup>c</sup>    | 5.00±0.0 <sup>c</sup> | 5.00±0.0 <sup>c</sup> | 5.00±0.0 <sup>c</sup>    |
|                            | 15                  | 5.00±0.0 <sup>c</sup>    | 5.00±0.0 <sup>c</sup>    | 5.00±0.0 <sup>c</sup> | 5.00±0.0 <sup>c</sup> | 5.00±0.0 <sup>c</sup>    | 5.00±0.0 <sup>c</sup>    | 5.00±0.0 <sup>c</sup> | 5.00±0.0 <sup>c</sup> | 5.00±0.0 <sup>c</sup>    |
|                            | 23                  | 4.20±0.06 <sup>c</sup>   | 4.24±0.05 <sup>c</sup>   | 5.00±0.0 <sup>c</sup> | 5.00±0.0 <sup>c</sup> | 5.00±0.0 <sup>c</sup>    | 4.66±0.04 <sup>d</sup>   | 5.00±0.0 <sup>c</sup> | 5.00±0.0 <sup>c</sup> | 5.00±0.0 <sup>c</sup>    |
|                            | 30                  | 3.64±0.05 <sup>a,b</sup> | 3.70±0.03 <sup>b</sup>   | 5.00±0.0 <sup>c</sup> | 5.00±0.0 <sup>c</sup> | 5.00±0.0 <sup>c</sup>    | 4.64±0.02 <sup>d</sup>   | 5.00±0.0 <sup>c</sup> | 5.00±0.0 <sup>c</sup> | 5.00±0.0 <sup>c</sup>    |
| Color                      | 1                   | 5.00±0.0 <sup>a</sup>    | 5.00±0.0 <sup>a</sup>    | 5.00±0.0 <sup>a</sup> | 5.00±0.0 <sup>a</sup> | 5.00±0.0 <sup>a</sup>    | 5.00±0.0 <sup>a</sup>    | 5.00±0.0 <sup>a</sup> | 5.00±0.0 <sup>a</sup> | 5.00±0.0 <sup>a</sup>    |
|                            | 8                   | 5.00±0.0 <sup>a</sup>    | 5.00±0.0 <sup>a</sup>    | 5.00±0.0 <sup>a</sup> | 5.00±0.0 <sup>a</sup> | 5.00±0.0 <sup>a</sup>    | 5.00±0.0 <sup>a</sup>    | 5.00±0.0 <sup>a</sup> | 5.00±0.0 <sup>a</sup> | 5.00±0.0 <sup>a</sup>    |
|                            | 15                  | 5.00±0.0 <sup>a</sup>    | 5.00±0.0 <sup>a</sup>    | 5.00±0.0 <sup>a</sup> | 5.00±0.0 <sup>a</sup> | 5.00±0.0 <sup>a</sup>    | 5.00±0.0 <sup>a</sup>    | 5.00±0.0 <sup>a</sup> | 5.00±0.0 <sup>a</sup> | 5.00±0.0 <sup>a</sup>    |
|                            | 23                  | 5.00±0.0 <sup>a</sup>    | 5.00±0.0 <sup>a</sup>    | 5.00±0.0 <sup>a</sup> | 5.00±0.0 <sup>a</sup> | 5.00±0.0 <sup>a</sup>    | 5.00±0.0 <sup>a</sup>    | 5.00±0.0 <sup>a</sup> | 5.00±0.0 <sup>a</sup> | 5.00±0.0 <sup>a</sup>    |
|                            | 30                  | 5.00±0.0 <sup>a</sup>    | 5.00±0.0 <sup>a</sup>    | 5.00±0.0 <sup>a</sup> | 5.00±0.0 <sup>a</sup> | 5.00±0.0 <sup>a</sup>    | 5.00±0.0 <sup>a</sup>    | 5.00±0.0 <sup>a</sup> | 5.00±0.0 <sup>a</sup> | 5.00±0.0 <sup>a</sup>    |
| Odor                       | 1                   | 5.00±0.0 <sup>d</sup>    | 5.00±0.0 <sup>d</sup>    | 5.00±0.0 <sup>d</sup> | 5.00±0.0 <sup>d</sup> | 4.30±0.0 <sup>b</sup>    | 5.00±0.0 <sup>d</sup>    | 5.00±0.0 <sup>d</sup> | 5.00±0.0 <sup>d</sup> | 5.00±0.0 <sup>d</sup>    |
|                            | 8                   | 5.00±0.0 <sup>d</sup>    | 5.00±0.0 <sup>d</sup>    | 5.00±0.0 <sup>d</sup> | 5.00±0.0 <sup>d</sup> | 4.20±0.02 <sup>a,b</sup> | 5.00±0.0 <sup>d</sup>    | 5.00±0.0 <sup>d</sup> | 5.00±0.0 <sup>d</sup> | 5.00±0.0 <sup>d</sup>    |
|                            | 15                  | 5.00±0.0 <sup>d</sup>    | 5.00±0.0 <sup>d</sup>    | 5.00±0.0 <sup>d</sup> | 5.00±0.0 <sup>d</sup> | 4.20±0.03 <sup>a,b</sup> | 5.00±0.0 <sup>d</sup>    | 5.00±0.0 <sup>d</sup> | 5.00±0.0 <sup>d</sup> | 5.00±0.0 <sup>d</sup>    |
|                            | 23                  | 5.00±0.0 <sup>d</sup>    | 5.00±0.0 <sup>d</sup>    | 5.00±0.0 <sup>d</sup> | 5.00±0.0 <sup>d</sup> | 4.18±0.02 <sup>a,b</sup> | 5.00±0.0 <sup>d</sup>    | 5.00±0.0 <sup>d</sup> | 5.00±0.0 <sup>d</sup> | 5.00±0.0 <sup>d</sup>    |
|                            | 30                  | 4.48±0.02 <sup>c</sup>   | 5.00±0.0 <sup>d</sup>    | 5.00±0.0 <sup>d</sup> | 5.00±0.0 <sup>d</sup> | 4.16±0.03 <sup>a</sup>   | 5.00±0.0 <sup>d</sup>    | 5.00±0.0 <sup>d</sup> | 5.00±0.0 <sup>d</sup> | 5.00±0.0 <sup>d</sup>    |
| Taste                      | 1                   | 5.00±0.0 <sup>g</sup>    | 5.00±0.0 <sup>g</sup>    | 5.00±0.0 <sup>g</sup> | 5.00±0.0 <sup>g</sup> | 3.40±0.04 <sup>b</sup>   | 5.00±0.0 <sup>g</sup>    | 5.00±0.0 <sup>g</sup> | 5.00±0.0 <sup>g</sup> | 3.46±0.03 <sup>b</sup>   |
|                            | 8                   | 5.00±0.0 <sup>g</sup>    | 5.00±0.0 <sup>g</sup>    | 5.00±0.0 <sup>g</sup> | 5.00±0.0 <sup>g</sup> | 3.38±0.05 <sup>a,b</sup> | 5.00±0.0 <sup>g</sup>    | 5.00±0.0 <sup>g</sup> | 5.00±0.0 <sup>g</sup> | 3.42±0.05 <sup>b</sup>   |
|                            | 15                  | 5.00±0.0 <sup>g</sup>    | 5.00±0.0 <sup>g</sup>    | 5.00±0.0 <sup>g</sup> | 5.00±0.0 <sup>g</sup> | 3.35±0.06 <sup>b,c</sup> | 5.00±0.0 <sup>g</sup>    | 5.00±0.0 <sup>g</sup> | 5.00±0.0 <sup>g</sup> | 3.40±0.04 <sup>b</sup>   |
|                            | 23                  | 4.80±0.05 <sup>f</sup>   | 4.80±0.05 <sup>f,g</sup> | 5.00±0.0 <sup>g</sup> | 5.00±0.0 <sup>g</sup> | 3.34±0.04 <sup>a,b</sup> | 4.80±0.6 <sup>f</sup>    | 5.00±0.0 <sup>g</sup> | 5.00±0.0 <sup>g</sup> | 3.38±0.07 <sup>a,b</sup> |
|                            | 30                  | 3.52±0.06 <sup>b,c</sup> | 3.68±0.07 <sup>c,d</sup> | 5.00±0.0 <sup>g</sup> | 5.00±0.0 <sup>g</sup> | 3.34±0.06 <sup>a,b</sup> | 4.58±0.0 <sup>c</sup>    | 5.00±0.0 <sup>g</sup> | 5.00±0.0 <sup>g</sup> | 3.35±0.06 <sup>a,b</sup> |
| Overall acceptance         | 1                   | 5.00±0.0 <sup>g</sup>    | 5.00±0.0 <sup>g</sup>    | 5.00±0.0 <sup>g</sup> | 5.00±0.0 <sup>g</sup> | 4.43±0.06 <sup>b,c</sup> | 5.00±0.0 <sup>g</sup>    | 5.00±0.0 <sup>g</sup> | 5.00±0.0 <sup>g</sup> | 4.62±0.01 <sup>c</sup>   |
|                            | 8                   | 5.00±0.0 <sup>g</sup>    | 5.00±0.0 <sup>g</sup>    | 5.00±0.0 <sup>g</sup> | 5.00±0.0 <sup>g</sup> | 4.40±0.06 <sup>b,c</sup> | 5.00±0.0 <sup>g</sup>    | 5.00±0.0 <sup>g</sup> | 5.00±0.0 <sup>g</sup> | 4.61±0.01 <sup>c</sup>   |
|                            | 15                  | 5.00±0.0 <sup>g</sup>    | 5.00±0.0 <sup>g</sup>    | 5.00±0.0 <sup>g</sup> | 5.00±0.0 <sup>g</sup> | 4.39±0.01 <sup>b</sup>   | 5.00±0.0 <sup>g</sup>    | 5.00±0.0 <sup>g</sup> | 5.00±0.0 <sup>g</sup> | 4.60±0.01 <sup>c</sup>   |
|                            | 23                  | 4.75±0.03 <sup>d</sup>   | 4.77±0.01 <sup>d</sup>   | 5.00±0.0 <sup>g</sup> | 5.00±0.0 <sup>g</sup> | 4.38±0.01 <sup>b</sup>   | 4.87±0.03 <sup>c,f</sup> | 5.00±0.0 <sup>g</sup> | 5.00±0.0 <sup>g</sup> | 4.60±0.01 <sup>c</sup>   |

30

4.16±0.01 <sup>a</sup>4.35±0.02 <sup>b</sup>5.00±0.0 <sup>g</sup>5.00±0.0 <sup>g</sup>4.38±0.01 <sup>b</sup>4.81±0.01 <sup>c</sup>5.00±0.0 <sup>g</sup>5.00±0.0 <sup>g</sup>4.59±0.02 <sup>c</sup>

---

The results are presented as the mean of three measurements ± SD (standard deviation). Different letters (<sup>a-g</sup>) designate statistically different results (p≤ 0.05).
